# Supplementary material
Source: Springer Nature journal article supplement (https://www.springermedizin.de/resource/supplementary/12879_2008_664_MOESM5_ESM.pdf/9449458)
Supplement: MOESM5 [file 9449458]

**Table 3 – False positive cases.**

| <b>Pt.</b> | <b><i>Aspergillus</i><br/>DNA<br/>(fg/pellet)</b> | <b>BAL<br/>Culture</b> | <b>Clinical<br/>Diagnosis</b>    | <b>CT scan results and<br/>other clinical information</b>                                                                  |
|------------|---------------------------------------------------|------------------------|----------------------------------|----------------------------------------------------------------------------------------------------------------------------|
| <b>1</b>   | <b>5230</b>                                       | <b>negative</b>        | <b>DAH</b>                       | <b>Organizing pneumonia on lung biopsy with pulmonary hemorrhage; treated with ambisome empirically; No IPA at autopsy</b> |
| <b>2</b>   | <b>230</b>                                        | <b>negative</b>        | <b>BOOP</b>                      | <b>Bilateral patchy opacities; no mould active antifungal therapy given</b>                                                |
| <b>3</b>   | <b>60</b>                                         | <b>negative</b>        | <b>Unknown</b>                   | <b>Nodular right middle lobe infiltrate treated with levofloxacin; exposure to hay</b>                                     |
| <b>4</b>   | <b>340</b>                                        | <b>negative</b>        | <b>IPA</b>                       | <b>Multiple bilateral nodules; treated as IPA with voriconazole + caspofungin</b>                                          |
| <b>5</b>   | <b>320</b>                                        | <b>negative</b>        | <b>DAH</b>                       | <b>Bilateral geographic grounds glass opacities; treated with caspofungin</b>                                              |
| <b>6</b>   | <b>80</b>                                         | <b>negative</b>        | <b>BOOP</b>                      | <b>Numerous bilateral ground glass opacities; treated with prednisone but no antifungal therapy</b>                        |
| <b>7</b>   | <b>170</b>                                        | <b>negative</b>        | <b>Influenza pneumonia / PCP</b> | <b>Left lung infiltrates; no antifungal therapy except for Pneumocystis</b>                                                |
